# Supplementary material for: Automated Scoring of Alzheimer’s Disease Atrophy Scale with Subtype Classification Using Deep Learning-Based T1-Weighted Magnetic Resonance Image Segmentation
Source: PubMed Central journal article supplement — J Alzheimers Dis Rep. 2024 May 17;8(1):863–76. doi: 10.3233/ADR-230105 (PMC11191633; doi:10.3233/adr-230105), 2024-05-17
Supplement: adr-8-adr230105-s001.pdf [file adr-8-adr230105-s001.pdf]

# Supplementary Material

## Automated Scoring of Alzheimer's Disease Atrophy Scale with Subtype Classification Using Deep Learning-Based T1-Weighted Magnetic Resonance Image Segmentation

**Supplementary Table 1.** Summary of the MR protocol for each site

| Scanner name           |                   | Scanner manufacturing | TR (ms) | TE (ms) | FA (°) | image matrix | voxel size (mm <sup>3</sup> ) |
|------------------------|-------------------|-----------------------|---------|---------|--------|--------------|-------------------------------|
| <b>Development Set</b> |                   |                       |         |         |        |              |                               |
| Site 1                 | Achieva           | Philips, Netherlands  | 9.3     | 4.6     | 8      | 224×224      | 1.0×1.0×1.0                   |
| Site 2                 | Achieva           | Philips, Netherlands  | 9.7     | 4.6     | 8      | 256×256      | 1.0×1.0×1.0                   |
|                        | Ingenia Elition X |                       | 9.4     | 4.4     |        |              |                               |
| Site 3                 | Ingenia CX        |                       | 8.5     | 4.3     |        | 256×256      | 1.0×1.0×1.0                   |
|                        | Skyra             | Siemens, Germany      | 1940    | 2.6     | 9      |              |                               |
| Site 4                 | Ingenia CX        | Philips, Netherlands  | 9.8     | 4.6     | 9      | 230×230      | 1.0×1.0×1.0                   |
| Site 5                 | Vida              | Siemens, Germany      | 2090    | 2.8     | 9      | 256×256      | 1.0×1.0×1.0                   |
| Site 6                 | Verio             | Siemens, Germany      | 1,900   | 2.5     | 9      | 256×256      | 1.0×1.0×1.0                   |
| Site 7                 |                   | GE HealthCare,        | 8.5     | 3.2     | 12     | 256×256      | 1.0×1.0×1.0                   |
|                        | DISCOVERY         | USA                   | 8.3     | 4.6     | 8      |              |                               |
|                        | MR750w            | Philips, Netherlands  | 1554.3  | 2.3     | 9      |              |                               |
|                        | Ingenia CX        | Siemens, Germany      |         |         |        |              |                               |
|                        | Skyra/ Skyra fit  |                       |         |         |        |              |                               |
| <b>Validation Set</b>  |                   |                       |         |         |        |              |                               |
| Site 1                 | Achieva           | Philips, Netherlands  | 9.3     | 4.6     | 8      | 224×224      | 1.0×1.0×1.0                   |
| Site 2                 | Achieva           | Philips, Netherlands  | 9.7     | 4.6     | 8      | 256×256      | 1.0×1.0×1.0                   |
|                        | Ingenia Elition X |                       | 9.4     | 4.4     |        |              |                               |
| Site 3                 | Ingenia CX        |                       | 8.5     | 4.3     |        | 256×256      | 1.0×1.0×1.0                   |
|                        | Skyra             | Siemens, Germany      | 1940    | 2.6     | 9      |              |                               |

TE, echo time; TR, repetition time; FA, flip angle

**Supplementary Table 2.** Comparison of radiologists' consensus visual scoring results and volume-based scoring data distribution with each regional occupancy index mean and standard deviation.

| visual score    | V0            | V1            | V2            | V3            | V4            |
|-----------------|---------------|---------------|---------------|---------------|---------------|
| HOC (mean ± SD) | 0.979 ± 0.015 | 0.931 ± 0.045 | 0.831 ± 0.066 | 0.735 ± 0.097 | 0.658 ± 0.135 |
| Q1 (% , N)      | 6.2% (22)     | 2.8% (10)     | 0.3% (1)      | 0% (0)        | 0% (0)        |
| Q2 (% , N)      | 4.8% (17)     | 11.5% (41)    | 0% (0)        | 0% (0)        | 0% (0)        |
| Q3 (% , N)      | 0.6% (2)      | 12.4% (44)    | 3.1% (11)     | 0.3% (1)      | 0% (0)        |
| Q4 (% , N)      | 0% (0)        | 7.6% (27)     | 13.2% (47)    | 1.7% (6)      | 0.8% (3)      |
| Q5 (% , N)      | 0% (0)        | 1.4% (5)      | 14.6% (52)    | 13.2% (47)    | 5.4% (19)     |
| TOC (mean ± SD) | 0.989 ± 0.008 | 0.961 ± 0.026 | 0.900 ± 0.041 | 0.83 ± 0.068  | 0.757 ± 0.106 |
| Q1 (% , N)      | 6.2% (22)     | 2.8% (10)     | 0.3% (1)      | 0% (0)        | 0% (0)        |
| Q2 (% , N)      | 4.8% (17)     | 12.7% (45)    | 0% (0)        | 0% (0)        | 0% (0)        |
| Q3 (% , N)      | 0.6% (2)      | 13% (46)      | 3.7% (13)     | 0.3% (1)      | 0% (0)        |
| Q4 (% , N)      | 0% (0)        | 5.9% (21)     | 14.9% (53)    | 1.7% (6)      | 0.6% (2)      |
| Q5 (% , N)      | 0% (0)        | 1.4% (5)      | 12.4% (44)    | 13.2% (47)    | 5.6% (20)     |
| POC (mean ± SD) | 0.994 ± 0.008 | 0.989 ± 0.012 | 0.978 ± 0.017 | 0.972 ± 0.019 | –             |
| Q1 (% , N)      | 2% (7)        | 7.3% (26)     | 0.6% (2)      | 0% (0)        | –             |
| Q2 (% , N)      | 1.1% (4)      | 13.8% (49)    | 1.7% (6)      | 0.3% (1)      | –             |
| Q3 (% , N)      | 0.8% (3)      | 13.5% (48)    | 4.5% (16)     | 0.3% (1)      | –             |
| Q4 (% , N)      | 0.3% (1)      | 13.2% (47)    | 9.6% (34)     | 1.7% (6)      | –             |
| Q5 (% , N)      | 0.6% (2)      | 10.7% (38)    | 14.4% (51)    | 3.7% (13)     | –             |
| FOC (mean ± SD) | 0.997 ± 0.004 | 0.990 ± 0.008 | 0.977 ± 0.017 | 0.977 ± 0.017 | –             |
| Q1 (% , N)      | 6.5% (23)     | 3.7% (13)     | 0.6% (2)      | 0% (0)        | –             |
| Q2 (% , N)      | 7.9% (28)     | 9.9% (35)     | 0.3% (1)      | 0% (0)        | –             |
| Q3 (% , N)      | 3.1% (11)     | 15.2% (54)    | 1.4% (5)      | 0% (0)        | –             |
| Q4 (% , N)      | 0.3% (1)      | 23.4% (83)    | 2.5% (9)      | 0.3% (1)      | –             |
| Q5 (% , N)      | 0.6% (2)      | 15.8% (56)    | 8.2% (29)     | 0.6% (2)      | –             |

V0–V4, consensus visual score 0 to 4; Q1–Q5: Quintile range 1–5; HOC, hippocampus occupancy index; TOC, medial temporal lobe occupancy index; FOC, frontal lobe occupancy index; POC, parietal lobe occupancy index; SD, standard deviation.
